# Supplementary material for: Improved performance of organic single-crystal thin-film transistors via contact doping with a high electron-affinity dopant
Source: Royal Society of Chemistry journal article supplement (doi:10.1039/d5tc03977k), 2026-01-01
Supplement: d5tc03977k1.pdf [file d5tc03977k1.pdf]

## Supporting Information

### Improved performance of organic single-crystal thin-film transistors via contact doping with a high electron-affinity dopant

Xinmin Shi,<sup>a</sup> Wei Deng,<sup>\*b</sup> Shiquan He,<sup>b</sup> Xiaobin Ren,<sup>b</sup> Haoyu Jiang,<sup>b</sup> Yuqing Luo,<sup>a</sup> Bo Zhao,<sup>a</sup> Xiujuan Zhang<sup>\*b</sup> and Jiansheng Jie<sup>\*ab</sup>

<sup>a</sup>Macao Institute of Materials Science and Engineering (MIMSE)  
MUST-SUDA Joint Research Center for Advanced Functional Materials  
Macau University of Science and Technology  
Taipa, Macau SAR 999078, China

<sup>b</sup>State Key Laboratory of Bioinspired Interfacial Materials Science  
Institute of Functional Nano & Soft Materials (FUNSOM)  
Soochow University  
Suzhou, Jiangsu 215123, China

\*Corresponding authors: Jiansheng Jie (jsjie@suda.edu.cn), Wei Deng (dengwei@suda.edu.cn) and Xiujuan Zhang (xjzhang@suda.edu.cn)

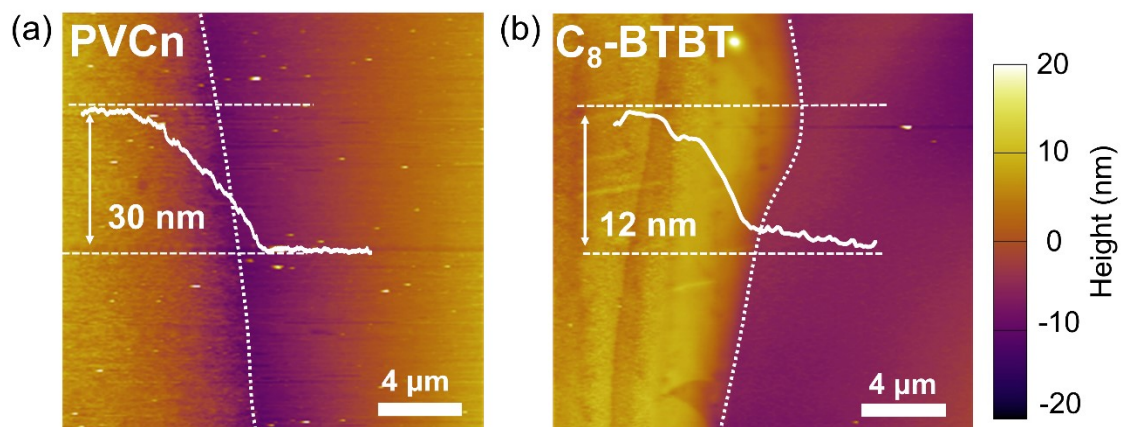

**Figure S1.** AFM height images and corresponding line profiles of the step structures used for thickness determination. (a) PVCn film deposited on SiO<sub>2</sub>, where the right region corresponds to the exposed SiO<sub>2</sub> surface and the left region corresponds to the PVCn film. (b) C<sub>8</sub>-BTBT film on SiO<sub>2</sub>, where the right region corresponds to the exposed SiO<sub>2</sub> surface and the left region corresponds to the C<sub>8</sub>-BTBT film.

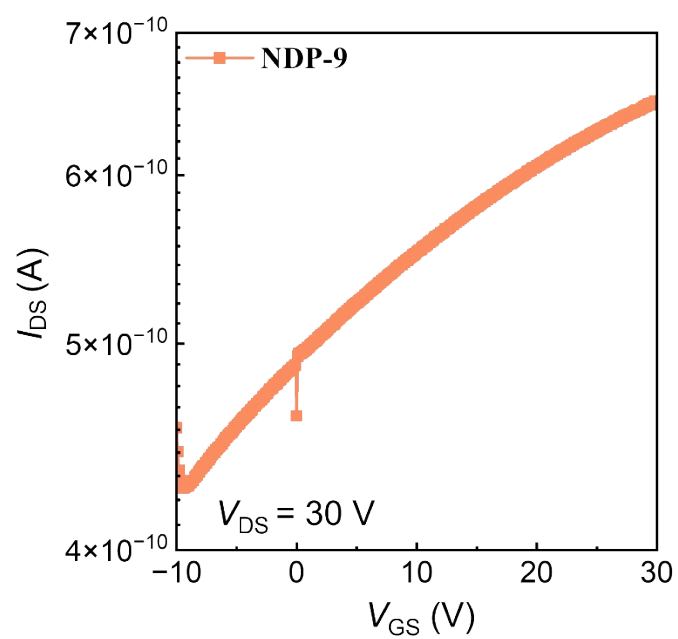

**Figure S2.** Transfer characteristics of the NDP-9-based transistor.

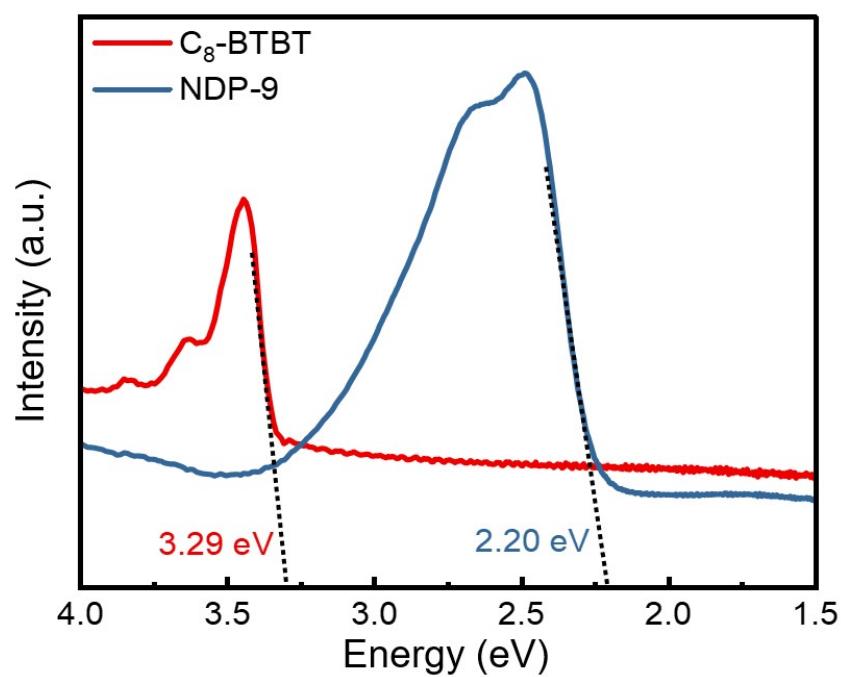

**Figure S3.** UV-Vis-NIR, the optical gap of NDP-9 is about 2.22 eV.

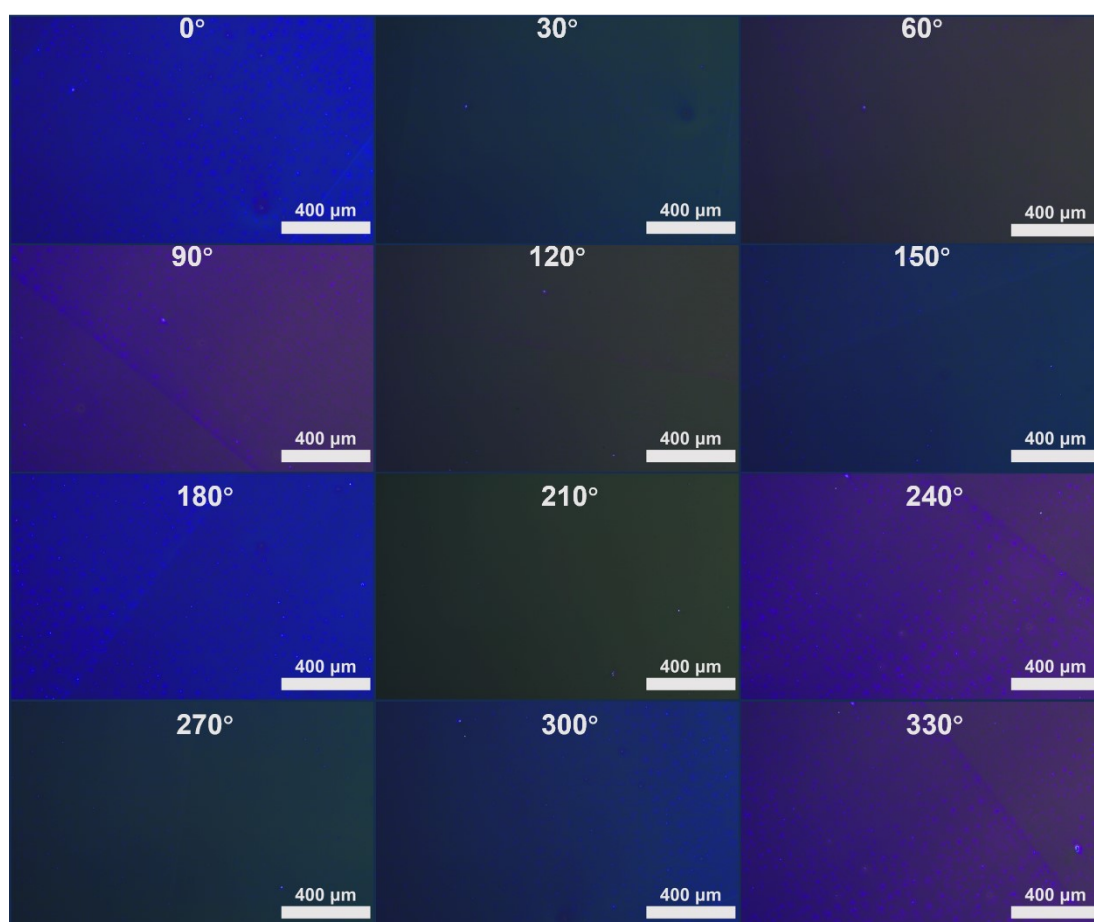

**Figure S4.** Orientation characterization. POM images of C<sub>8</sub>-BTBT OSCF captured under different polarization angles 0-360°.

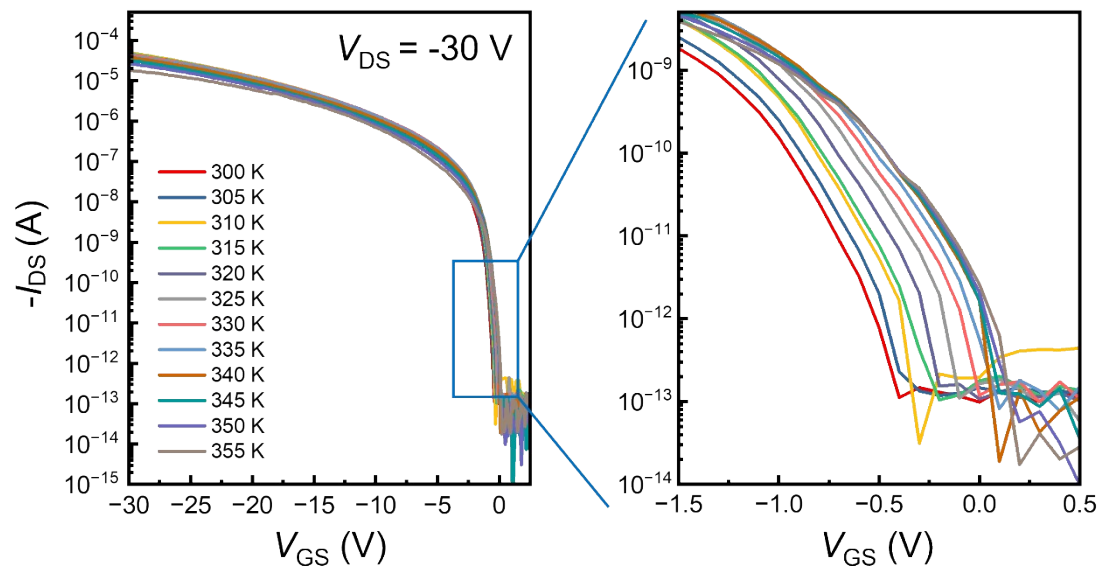

**Figure S5.** Transfer curves at different temperatures from 300 to 355 K.

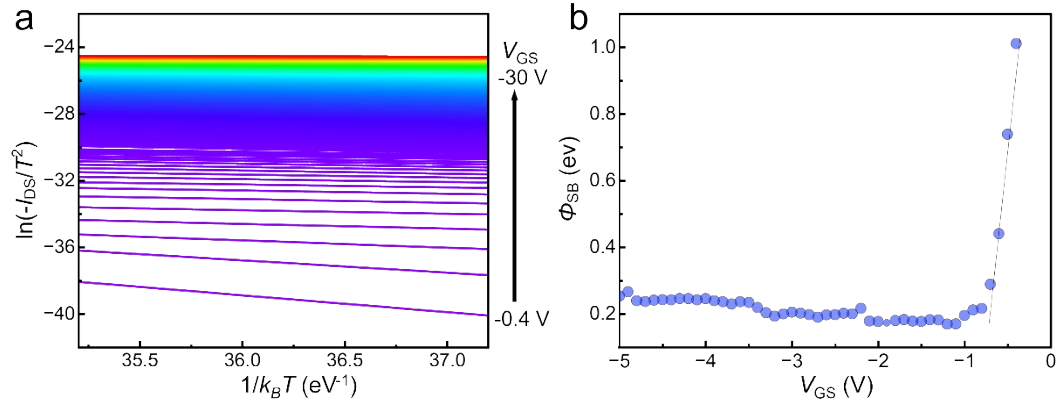

**Figure S6.** (a) The transfer curves under different temperature of the Schottky barrier OFET without the NDP-9 layer,  $V_{DS} = -30$  V. (b) The linear fitting results of  $\ln(I_{DS}/T^2)$  versus  $1/k_B T$  under different  $V_{GS}$ .

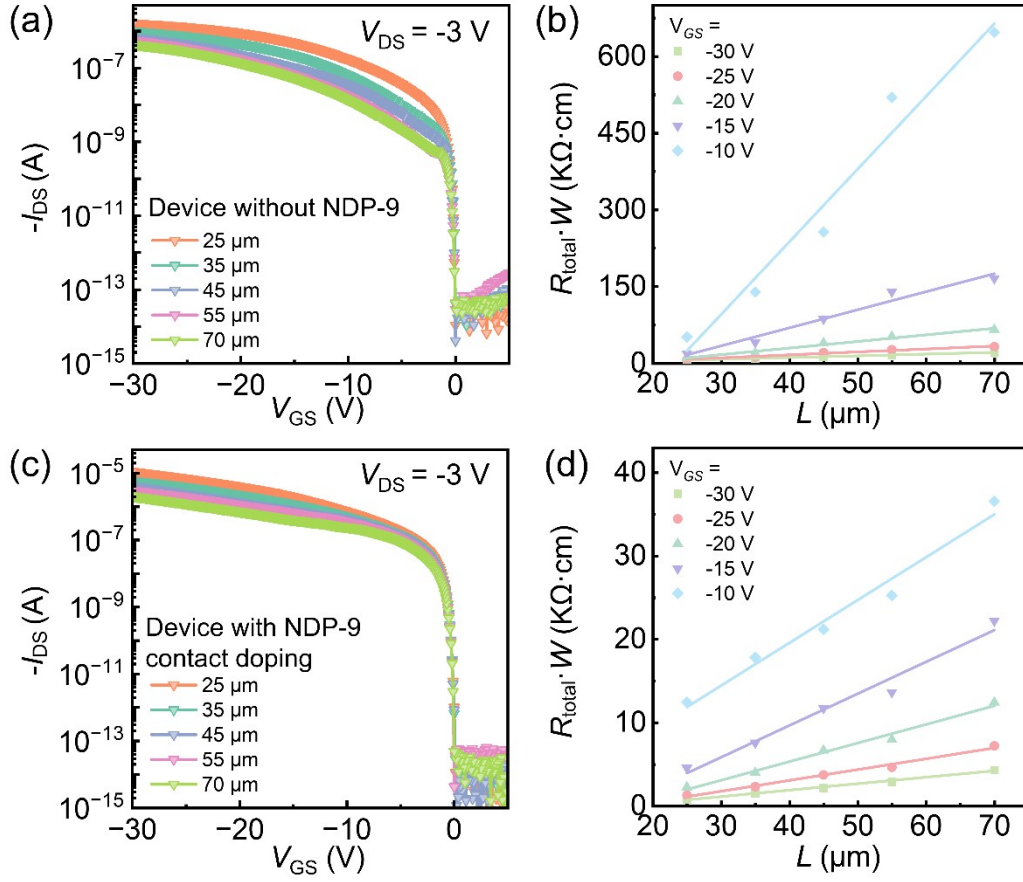

**Figure S7.** Transmission line method (TLM) analysis of OTFTs with and without an NDP-9 interlayer (a) Transfer characteristics of devices without NDP-9 measured at  $V_{DS} = -3$  V with different channel lengths. (b) Total resistance normalized by channel width ( $R_{\text{total}} \cdot W$ ) as a function of channel length for devices without NDP-9 at different  $V_{GS}$ . (c) Transfer characteristics of devices with NDP-9 contact doping measured at  $V_{DS} = -3$  V with different channel lengths. (d) Total resistance normalized by channel width ( $R_{\text{total}} \cdot W$ ) as a function of channel length for devices with NDP-9 contact doping at different  $V_{GS}$ .



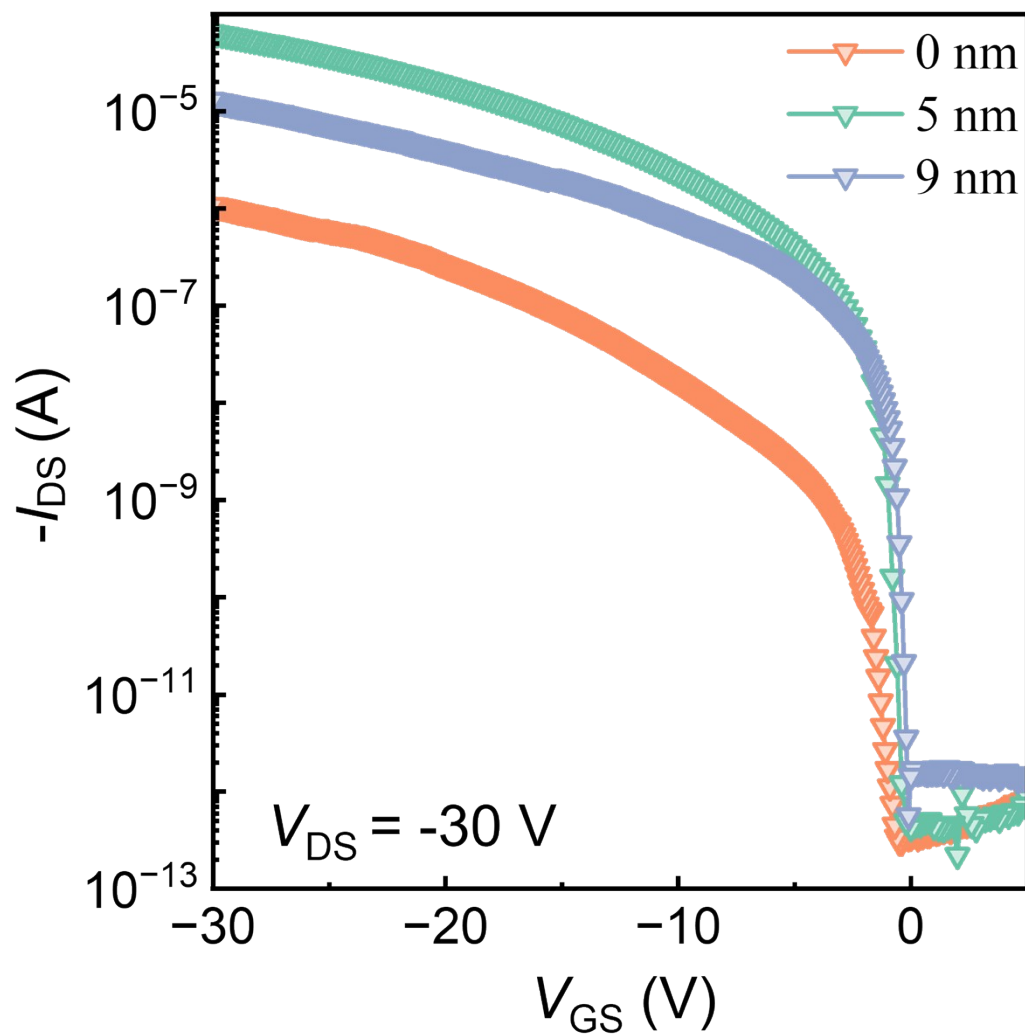

**Figure S8.** Transfer characteristics of OTFTs with different NDP-9 interlayer thicknesses (0, 5, and 9 nm) measured at  $V_{DS} = -30 V$ .

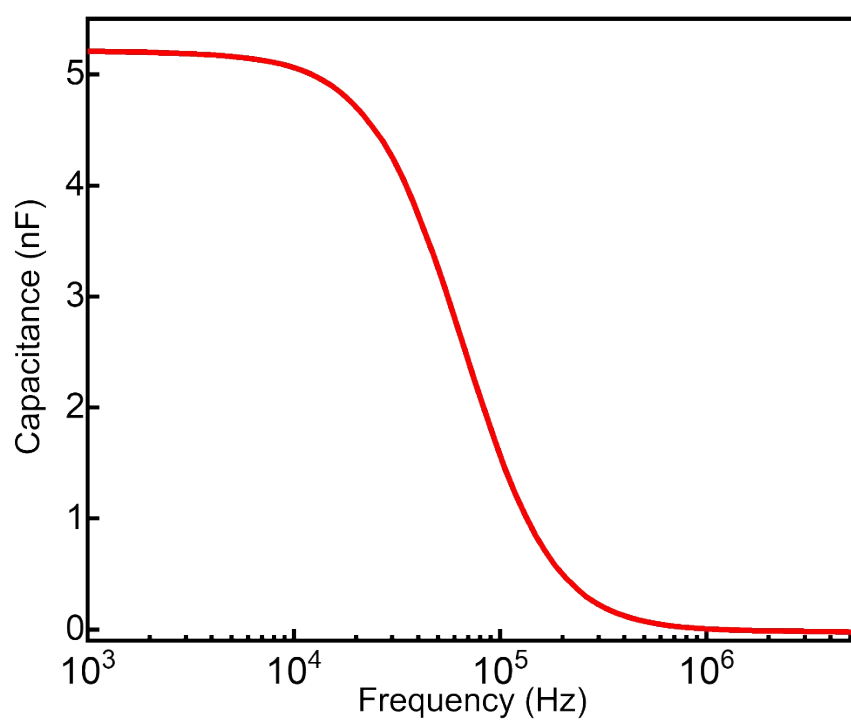

**Figure S9.** Capacity measurement of the  $\text{PVC}_n$  and  $\text{SiO}_2$  double-layer insulator.

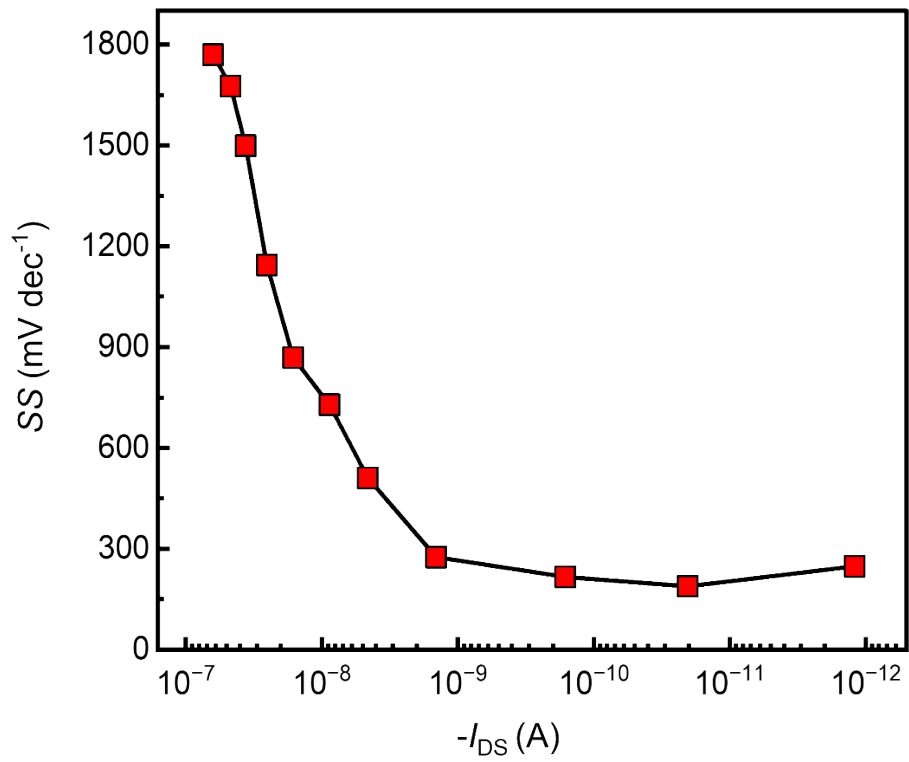

**Figure S10.** Subthreshold swing versus  $I_{DS}$  extracted from the transfer curve of the OSC-TFT with NDP-9 contact doping.

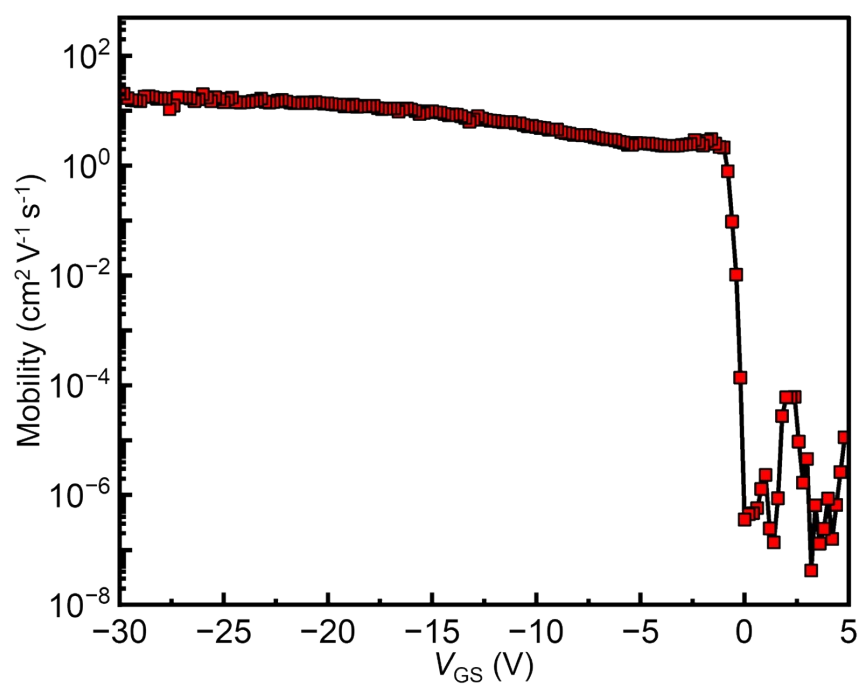

**Figure S11.** Mobility as a function of gate voltage in the OTFT with NDP-9 contact doping.

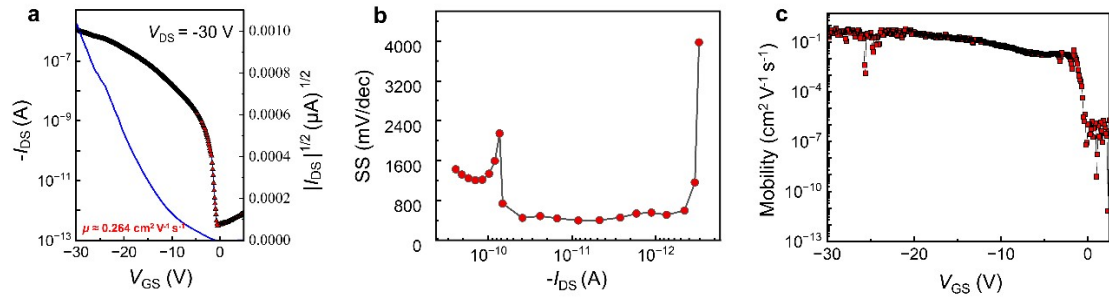

**Figure S12.** (a) Saturation region transfer. (b)  $I_{DS}$ -SS. (c) Mobility as a function of gate voltage in

the OSC-TFT without NDP-9 contact doping.

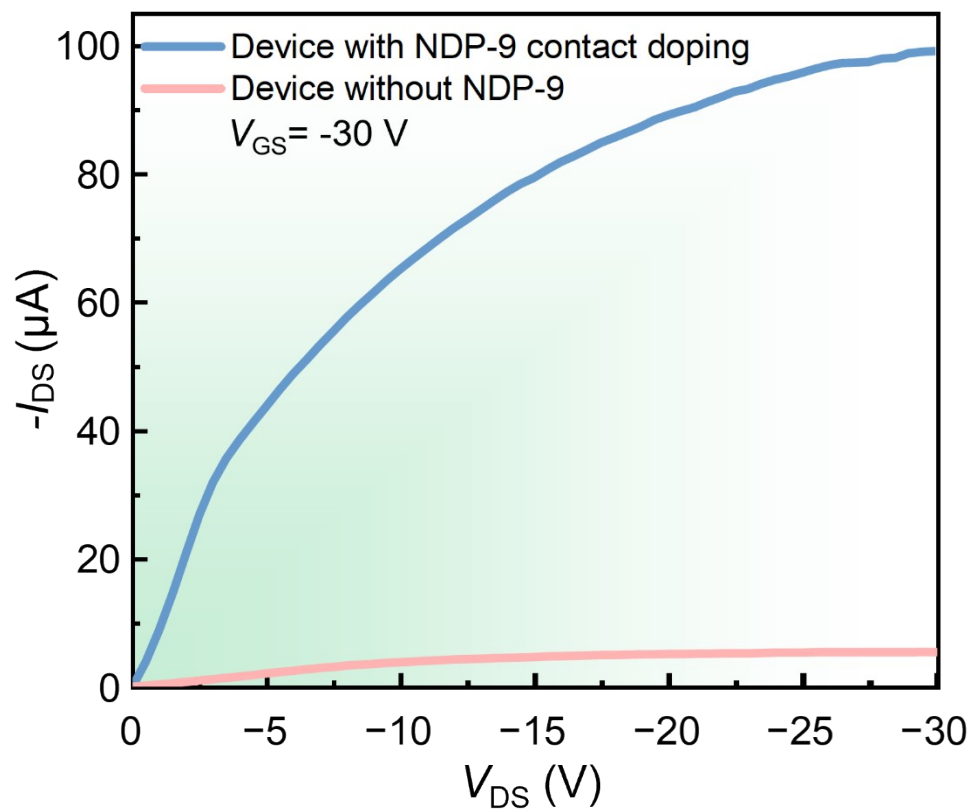

**Figure S13.** Output characteristics of OTFTs measured at  $V_{GS} = -30$  V, with (blue) and without (red) the NDP-9 interlayer. The NDP-9 device shows higher current and reduced nonlinearity.

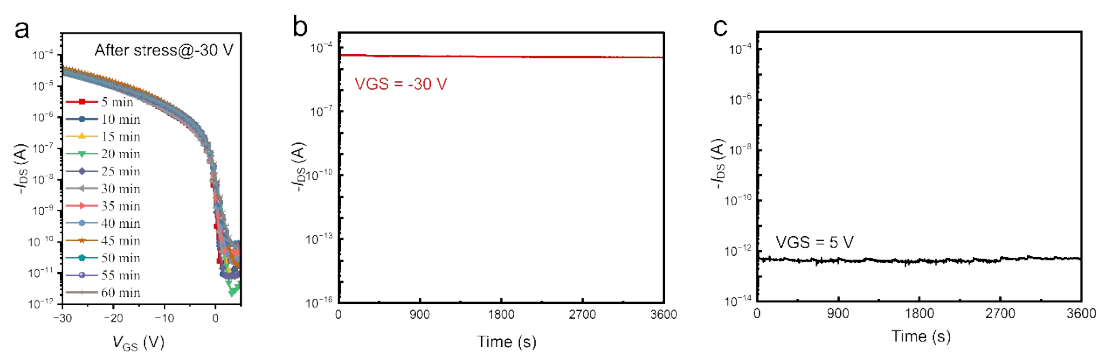

**Figure S14.** Bias-stress stability of NDP-9 contact-doped OTFTs.
